# Supplementary material for: The effect of co-sensitization methods between N719 and boron dipyrromethene triads on dye-sensitized solar cell performance
Source: Royal Society of Chemistry journal article supplement (doi:10.1039/c8ra00862k), 2018-01-01
Supplement: c8ra00862k1.pdf [file c8ra00862k1.pdf]

## Supporting Information

for

### Effect of Co-sensitization Methods between N719 and Boron Dipyrromethene Triad on Dye-sensitized Solar Cells Performance

Sompit Wanwong <sup>\*a,b</sup>, Weradesh Sangkhun <sup>a</sup> and Jatuphorn Wootthikanokkhan <sup>a,b</sup>

<sup>a</sup> Division of Materials Technology, School of Energy, Environment and Materials, King Mongkut's University of Technology Thonburi, Bangkok 10140, Thailand.

<sup>b</sup> Nanotec-KMUTT Center of Excellence on Hybrid Nanomaterials for Alternative Energy, King Mongkut's University of Technology Thonburi, Bangkok 10140, Thailand.

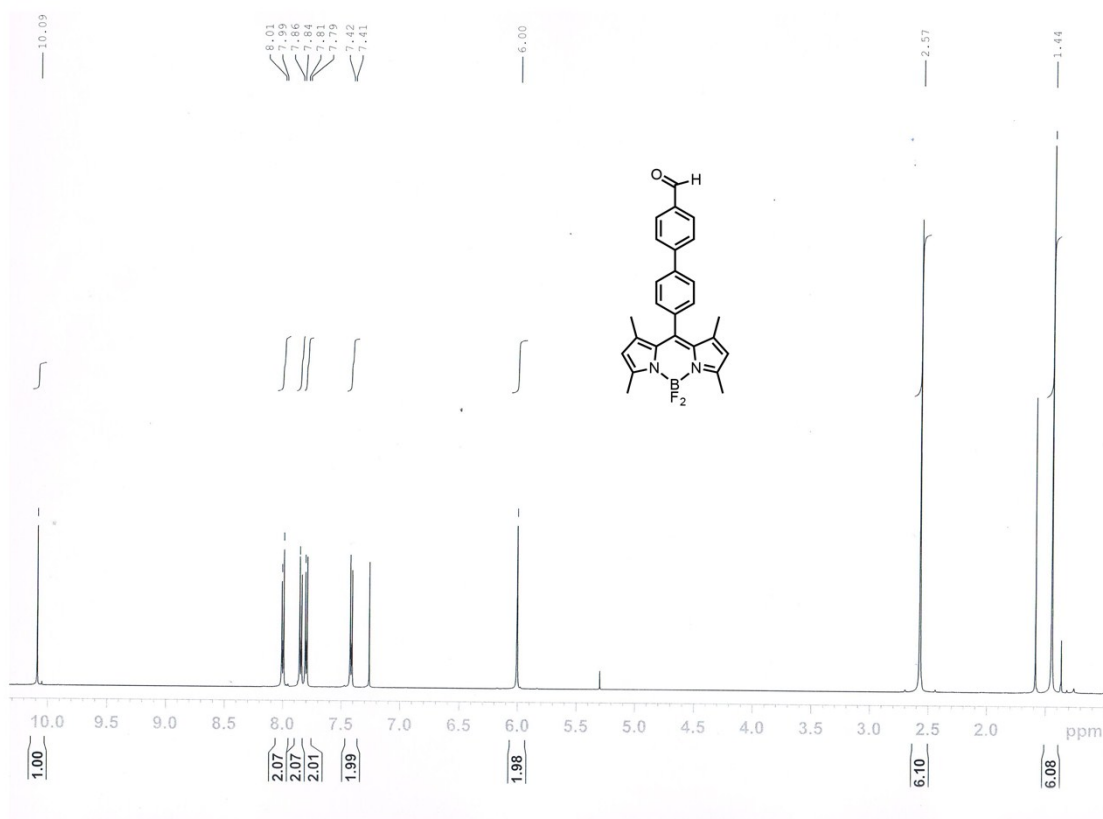

S1 <sup>1</sup>H-NMR of compound 2

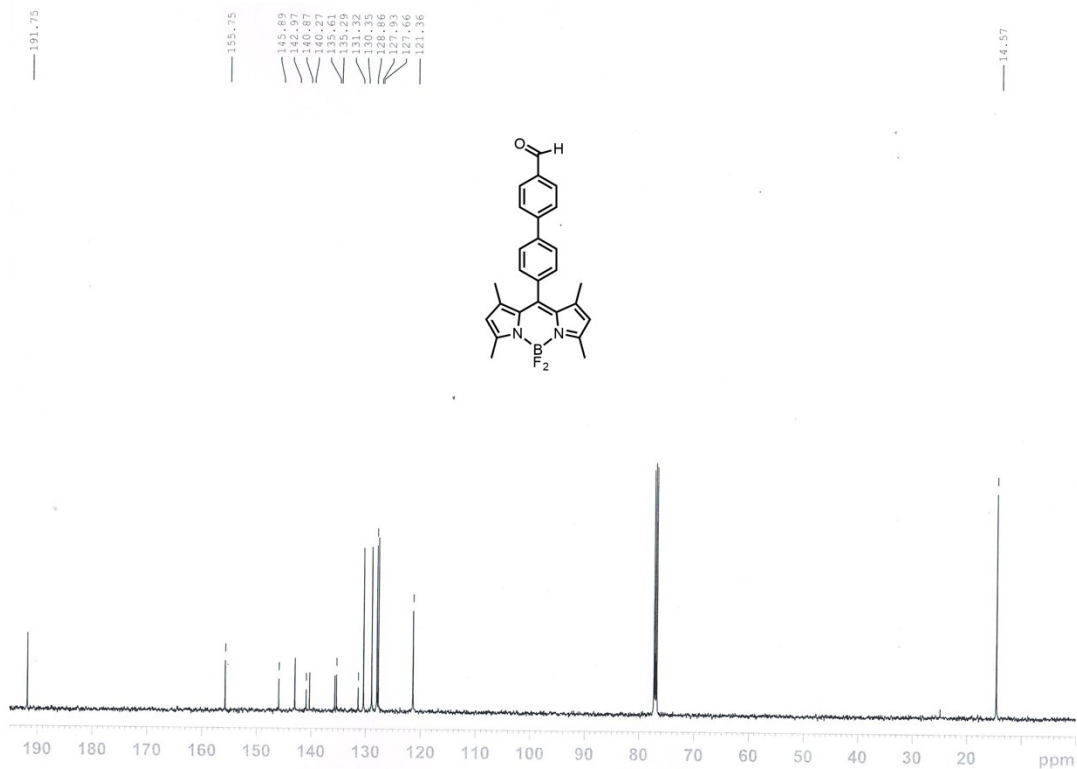

**S2** <sup>13</sup>C-NMR of compound 2

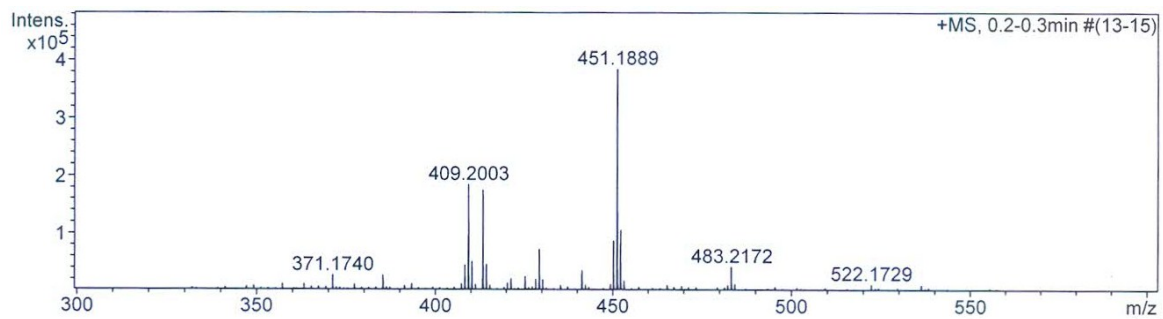

**S3** MS of compound 2

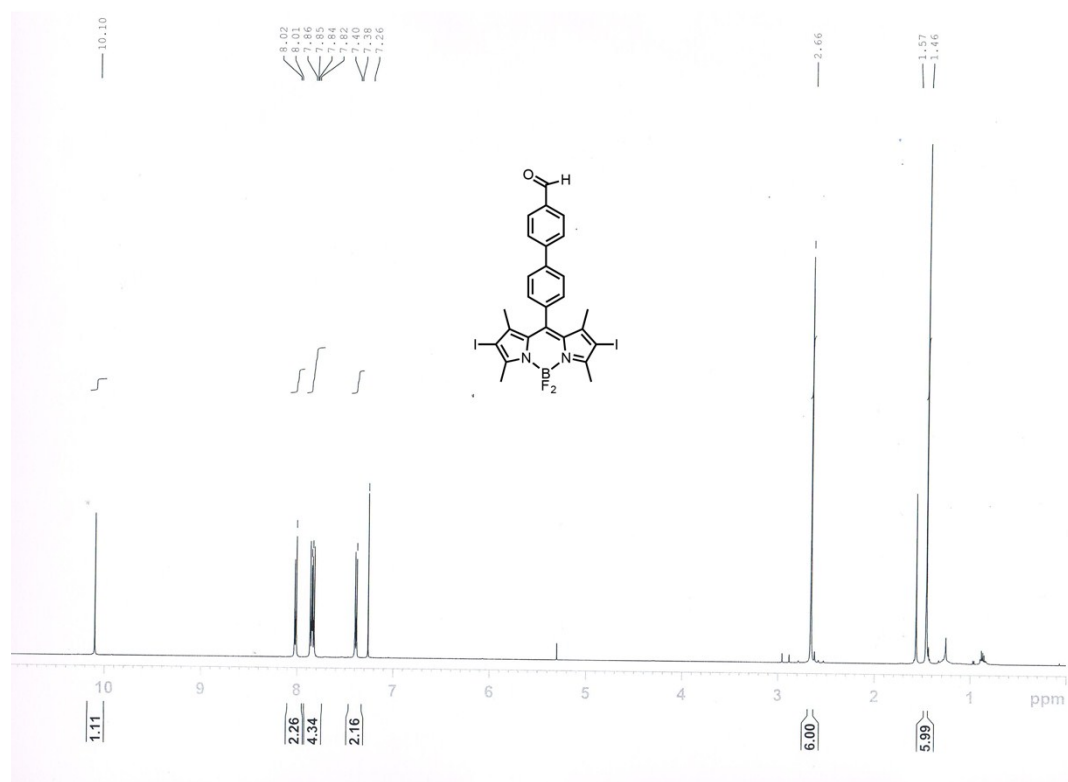

S4  $^1\text{H-NMR}$  of compound 3

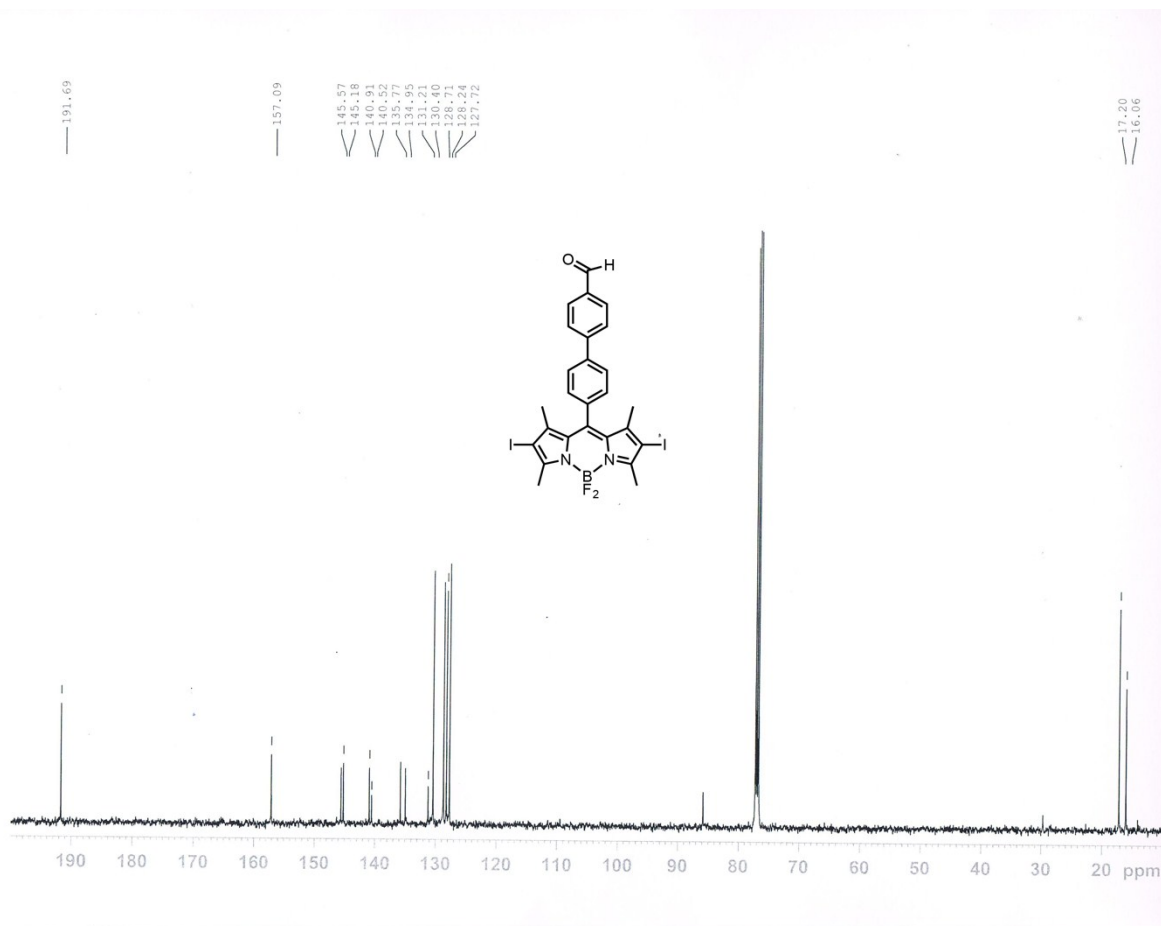

**S5** <sup>13</sup>C-NMR of compound **3**

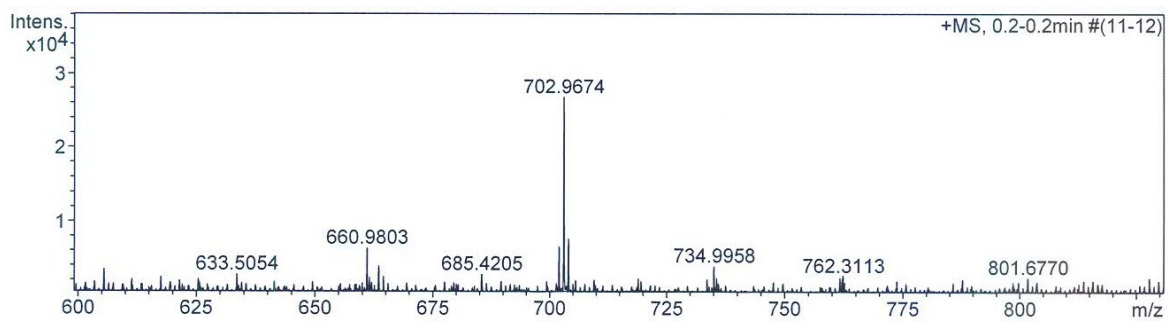

**S6** MS of compound **3**

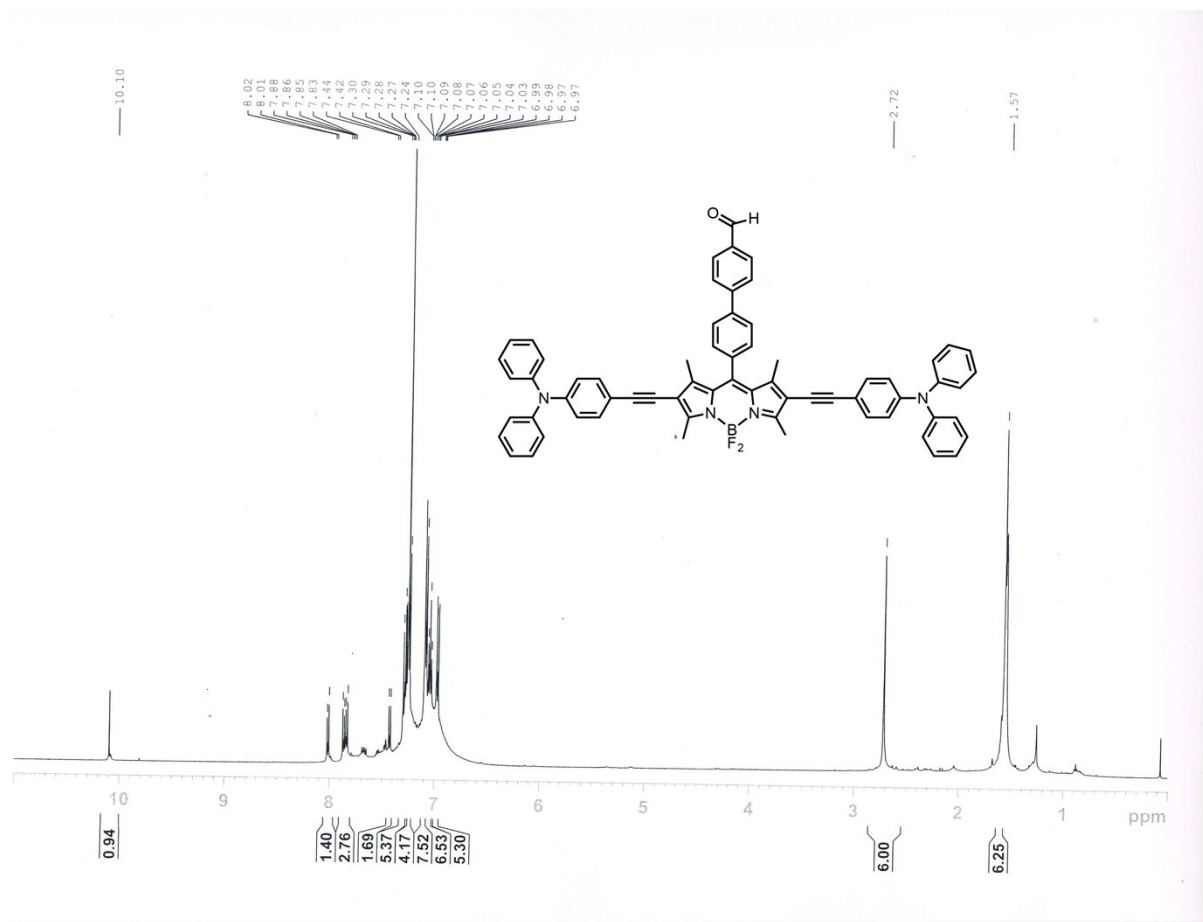

S7 <sup>1</sup>H-NMR of compound 4

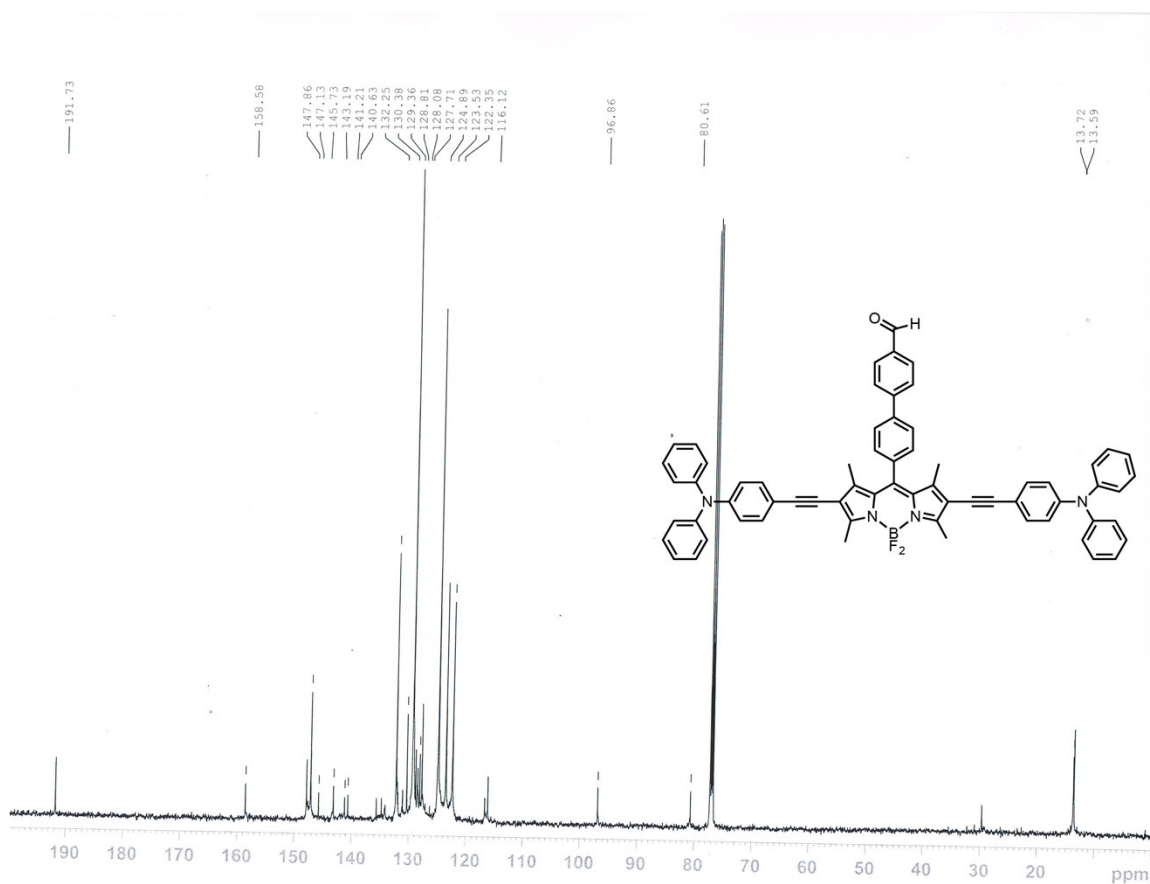

**S8**  $^{13}\text{C}$ -NMR of compound **4**

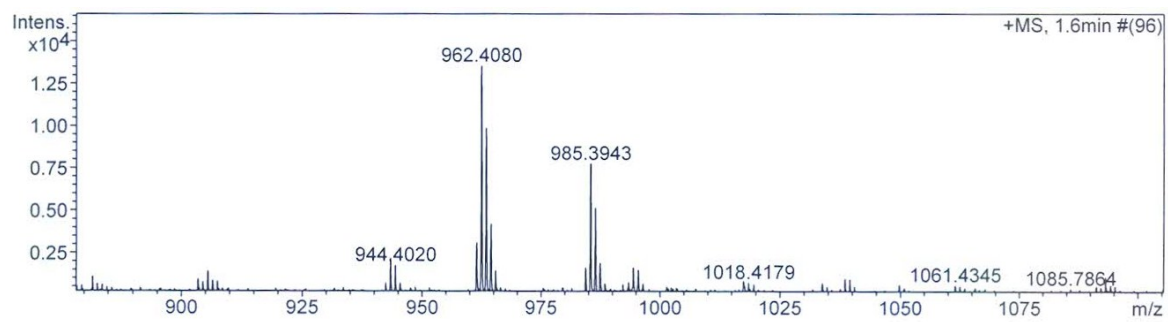

**S9** MS of compound **4**

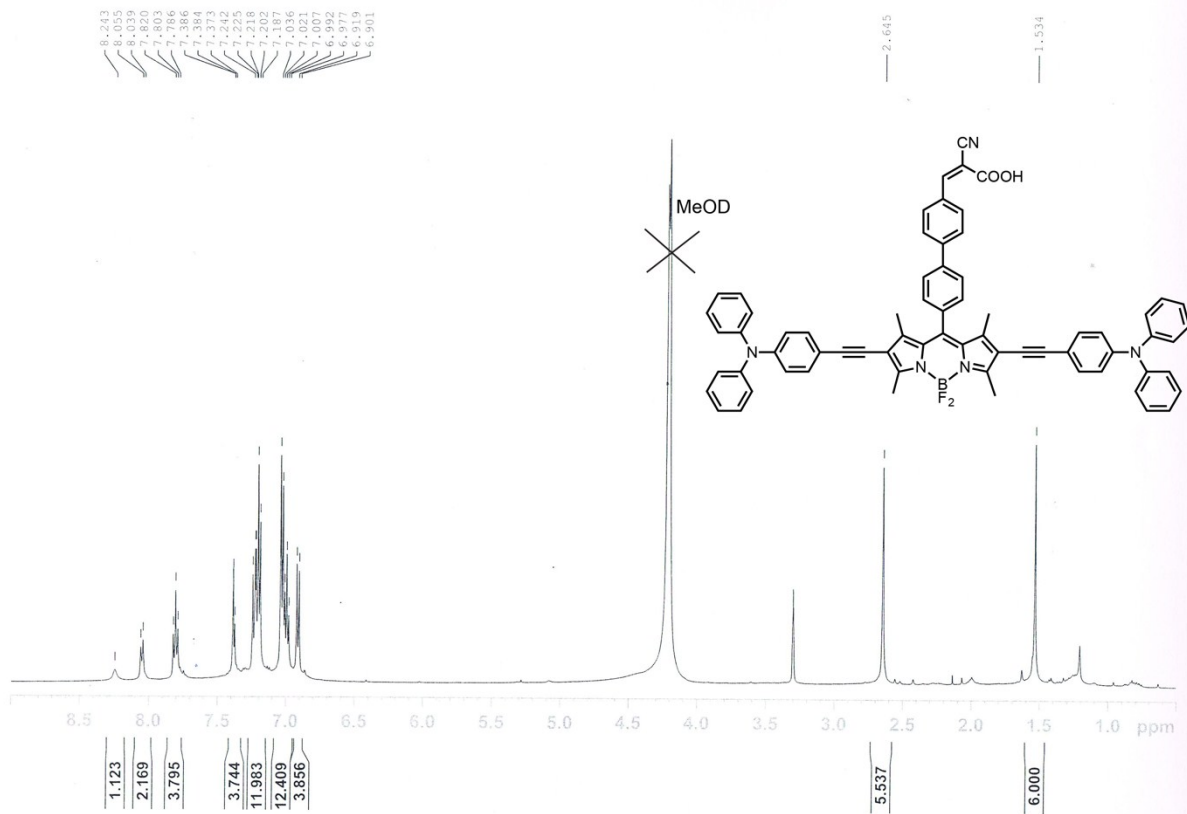

S10 <sup>1</sup>H-NMR of compound 5

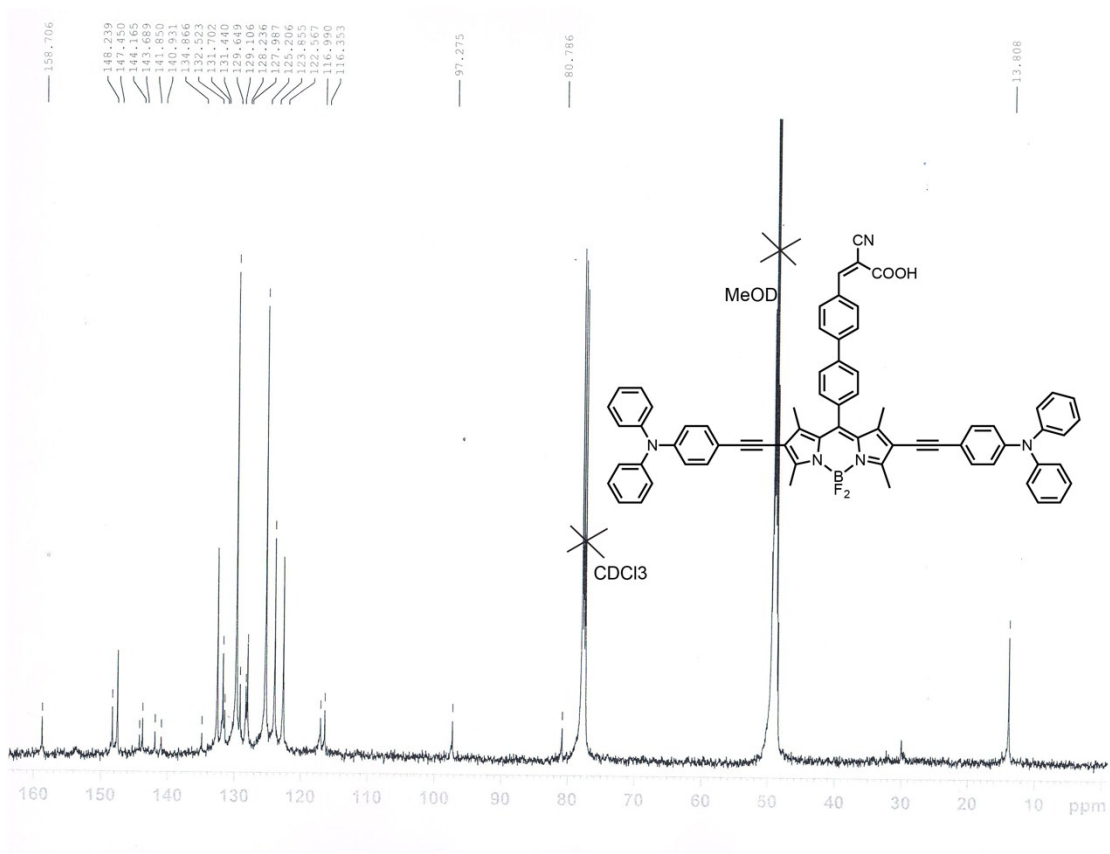

S11 <sup>13</sup>C-NMR of compound 5

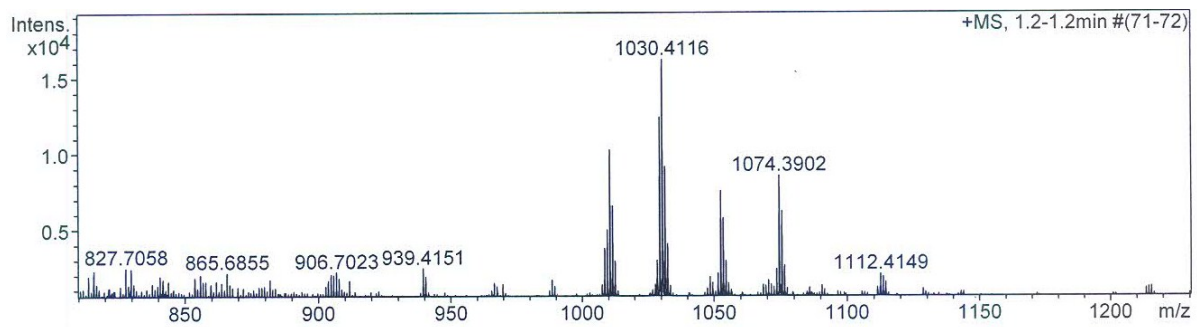

S12 MS of compound 5
